# Supplementary material for: Effect of a furan π-bridge on polymer coplanarity and performance in organic field effect transistors
Source: Royal Society of Chemistry journal article supplement (doi:10.1039/c3py00501a), 2013-01-01
Supplement: c3py00501a.pdf [file c3py00501a.pdf]

## Supporting information:

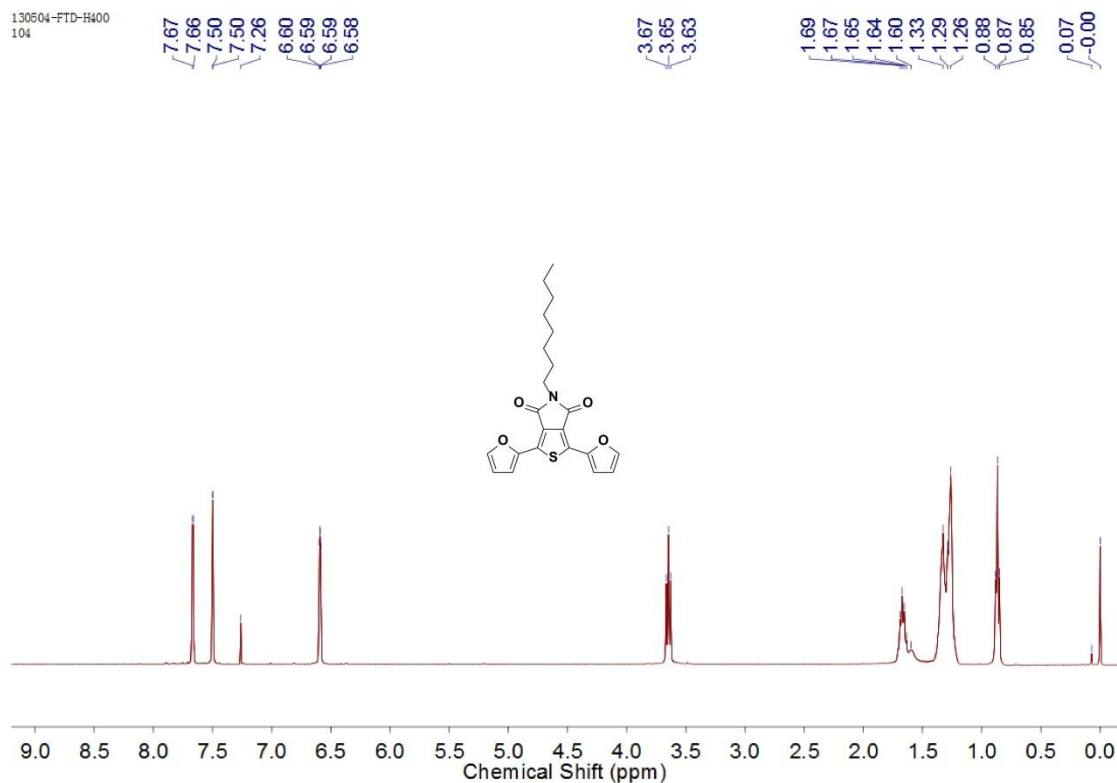

**Figure S1.** 400 MHz  $^1\text{H}$  NMR spectra of polymer 1,3-di(furan-2-yl)-5-octylthieno[3,4-c]pyrrole-4,6-dione in  $\text{CDCl}_3$

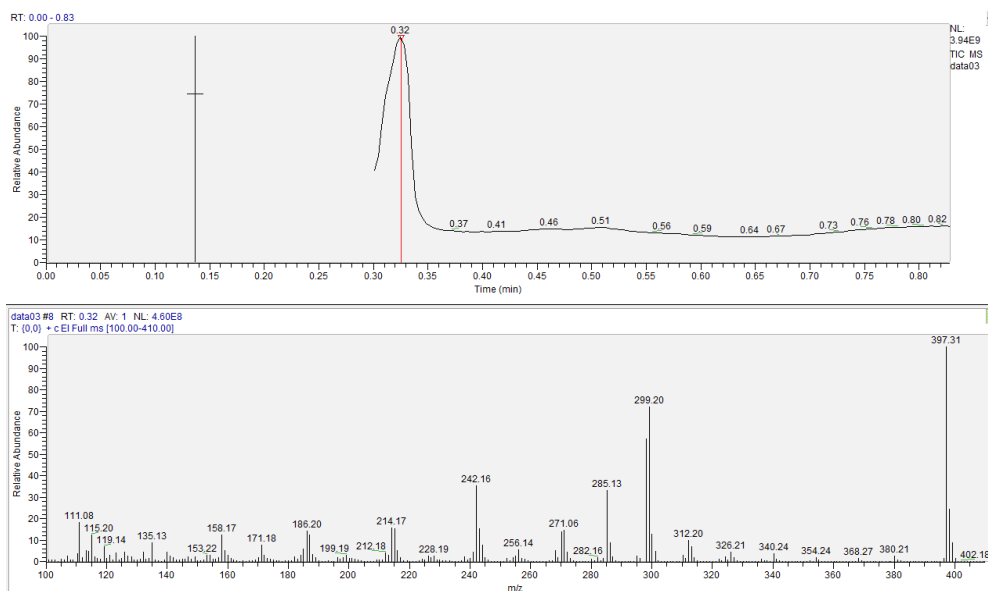

**Figure S2.** Mass spectra of 1,3-di(furan-2-yl)-5-octylthieno[3,4-c]pyrrole-4,6-dione

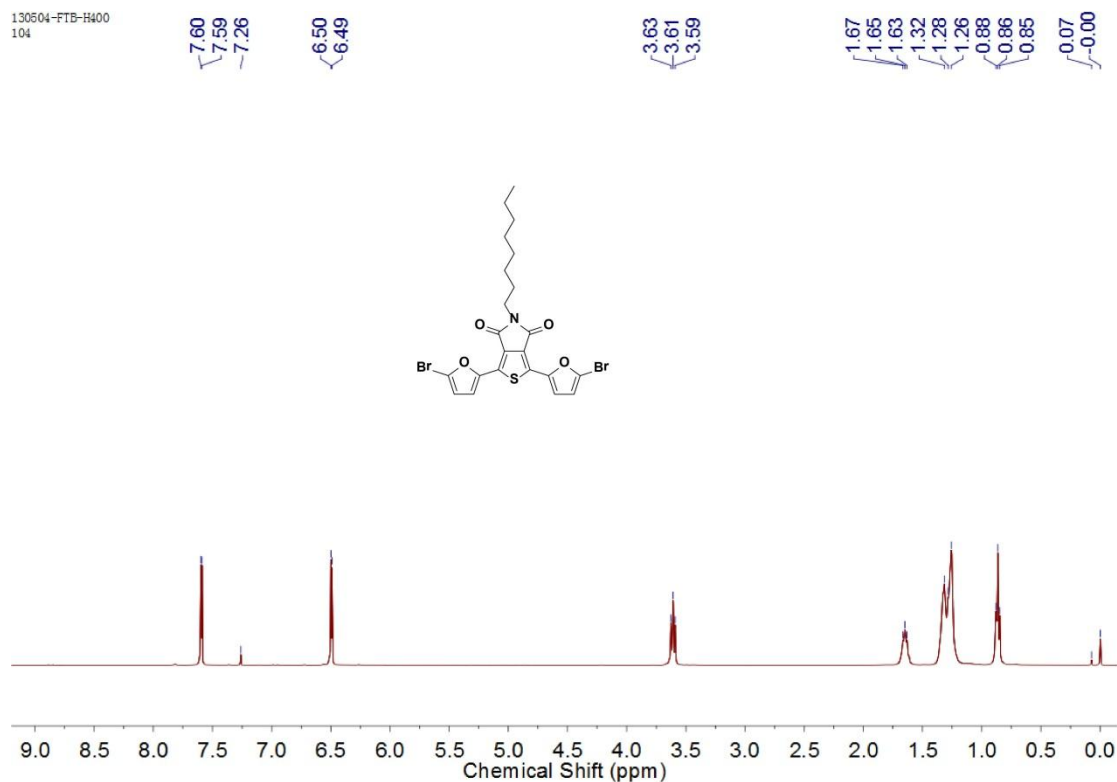

**Figure S3.** 400 MHz  $^1\text{H}$  NMR spectra of polymer 1,3-di(2'-bromofuran-5'-yl)-5-octylthieno[3,4-c]pyrrole-4,6-dione in  $\text{CDCl}_3$

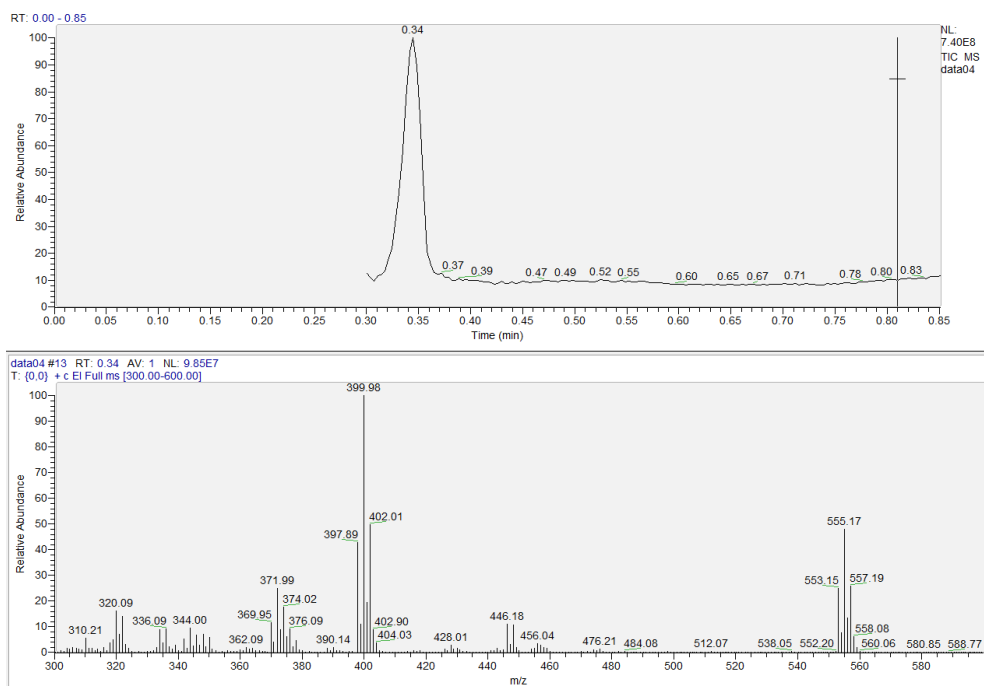

**Figure S4.** Mass spectra of 1,3-di(2'-bromofuran-5'-yl)-5-octylthieno[3,4-c]pyrrole-4,6-dione

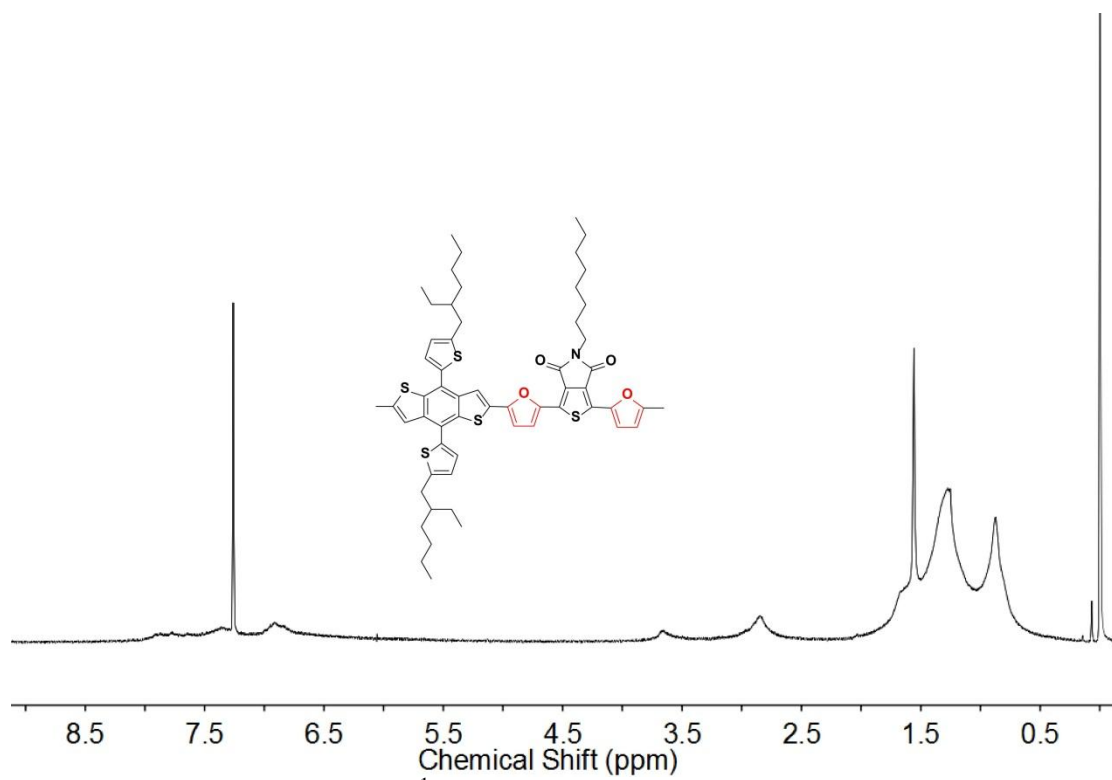

**Figure S5.** 400 MHz <sup>1</sup>H NMR spectra of polymer PTF8 in CDCl<sub>3</sub>
